# Supplementary material for: Spatial patterns of bat diversity overlap with woodpecker abundance
Source: PeerJ. 2020 Jun 18;8:e9385. doi: 10.7717/peerj.9385 (PMC7306217; doi:10.7717/peerj.9385)
Supplement: Supplemental Information 3 [file peerj-08-9385-s003.xlsx]

## Sheet: data
Point.id	Day.of.year	Hour	Bat.species	Bat.calls	B.bar	E.ser	M.spp	N.noc	P.aur	P.nath	P.pip	P.pyg	GSWoodpecker
las_C5	207	18.97	1	22.92	0	22.9227	0	0	0	0	0	0	0
las_D5	207	19.05	1	269.52	0	0	0	269.52	0	0	0	0	0
szast_I14	207	19.12	1	89.94	0	89.9434	0	0	0	0	0	0	2
szast_J14	207	19.27	3	514.38	0	340.759	0	0	0	23.2518	150.366	0	5
las_F1	168	19.38	1	6.17	0	0	0	0	0	0	0	6.1729	0
las_E5	207	19.38	2	17.7	0	2.69866	15.0058	0	0	0	0	0	0
szast_J10	168	19.4	1	35.47	0	0	0	35.4653	0	0	0	0	4
szast_H12	189	19.45	1	10.9	0	0	0	10.8977	0	0	0	0	1
las_I1	174	19.45	2	37.84	0	8.17109	0	29.6661	0	0	0	0	0
szast_J13	207	19.48	4	162.95	0	47.6889	0	14.6434	0	99.0811	1.53568	0	2
las_G1	168	19.53	5	95.03	0	29.314	8.18176	29.8328	0	8.12731	0	19.5761	2
las_F5	207	19.55	4	44.22	0	0	25.5755	0	4.06515	4.1593	0	7.33175	0
szast_H14	189	19.57	1	65.6	0	65.6009	0	0	0	0	0	0	2
las_H2	174	19.63	2	19.7	0	0	0	10.7291	0	0	0	8.97572	0
szast_J12	207	19.7	2	116.13	0	86.1798	0	0	0	29.9499	0	0	1
szast_H5	162	19.72	1	8.58	0	0	0	0	0	8.5758	0	0	1
las_H1	168	19.72	3	55.39	0	0	0	0	0	26.1535	14.9323	14.3091	0
szast_K9	168	19.75	1	6.42	0	0	0	6.42319	0	0	0	0	1
szast_H10	174	19.75	1	8.03	0	0	0	0	0	8.02636	0	0	0
szast_I15	197	19.77	2	46.8	0	24.4213	0	0	0	22.3782	0	0	1
szast_H15	189	19.78	3	82.81	0	52.3681	0	14.7947	0	15.6519	0	0	1
las_G3	174	19.83	5	256.25	0	97.0885	0	10.3961	0	68.3344	71.8221	8.60502	2
szast_J11	168	19.9	4	138.77	0	49.1374	0	71.6907	0	6.03602	11.1369	0	2
szast_H11	174	19.9	2	25.76	0	0	0	10.7814	0	14.9741	0	0	0
szast_J11	207	19.93	2	47.35	0	39.9266	0	0	0	7.42355	0	0	2
las_I1	168	19.93	4	496.54	83.1076	0	61.1024	0	0	82.0188	0	270.314	0
szast_I14	197	19.98	3	74.4	0	60.3442	0	0	0	4.23226	9.82645	0	2
szast_H9	181	20.02	2	65.46	0	0	0	10.8154	0	54.6425	0	0	0
szast_H16	189	20.02	2	335.17	0	0	0	275.467	0	59.704	0	0	2
szast_I6	162	20.03	2	5.38	0	0	0	1.7129	0	3.66304	0	0	3
las_H3	174	20.07	3	68.64	0	0	15.6178	8.69842	0	44.3231	0	0	0
las_G5	207	20.07	2	17.21	0	5.1793	0	0	0	0	0	12.0345	1
szast_J12	168	20.15	5	195.6	0	48.7316	7.94026	63.3669	0	60.5818	14.9808	0	1
szast_H12	174	20.15	3	72.96	0	35.4862	0	11.7584	0	25.7108	0	0	1
szast_J10	207	20.17	2	72.51	0	40.5638	0	31.948	0	0	0	0	4
las_H2	168	20.18	0	0	0	0	0	0	0	0	0	0	0
szast_J14	197	20.2	3	338.21	0	20.4498	0	0	0	132.839	184.508	0	5
szast_I16	189	20.27	4	272.23	0	14.995	0	130.983	0	116.368	9.88225	0	0
szast_H10	181	20.29	0	0	0	0	0	0	0	0	0	0	0
las_H5	207	20.32	1	16.49	0	0	0	16.4931	0	0	0	0	0
szast_H7	162	20.33	0	0	0	0	0	0	0	0	0	0	0
las_I3	174	20.37	2	16.34	0	0	4.47246	0	0	0	0	11.8667	2
szast_K9	207	20.38	3	111.1	0	81.8398	0	0	0	24.327	4.93567	0	1
las_G3	168	20.42	4	167.25	0	68.1732	7.70183	0	0	81.5976	0	9.77469	2
szast_J13	197	20.44	0	0	0	0	0	0	0	0	0	0	2
szast_J13	168	20.47	1	11.08	0	11.0779	0	0	0	0	0	0	2
szast_I15	189	20.5	4	150.35	0	40.7519	0	88.9492	0	6.08429	14.5666	0	1
szast_H14	174	20.52	0	5.46	0	0	0	0	0	0	0	0	2
szast_H11	181	20.56	0	0	0	0	0	0	0	0	0	0	0
las_H4	207	20.6	4	80.34	0	8.80909	11.3179	0	0	39.0134	0	21.1948	0
szast_I8	162	20.62	1	3.09	0	0	3.09088	0	0	0	0	0	1
szast_J14	168	20.63	3	103.28	0	24.4391	14.6109	0	0	58.6093	0	0	5
szast_I9	207	20.65	4	186.82	0	143.025	0	12.408	0	21.8922	9.49063	0	1
las_H3	168	20.67	5	67.03	0	12.1887	9.81495	9.87742	0	24.6298	0	10.5177	0
las_J3	174	20.67	1	14.7	0	0	14.6978	0	0	0	0	0	0
szast_H15	174	20.68	1	14.85	0	0	0	14.8467	0	0	0	0	1
szast_J12	197	20.68	2	19.73	0	9.50201	0	0	0	6.81148	0	0	1
szast_I14	189	20.73	1	31.4	0	31.4008	0	0	0	0	0	0	2
szast_I9	162	20.8	0	0	0	0	0	0	0	0	0	0	1
las_I4	174	20.8	2	33.39	0	0	0	7.73019	0	0	0	25.6585	1
szast_H12	181	20.83	1	14.19	0	0	0	14.1906	0	0	0	0	1
szast_H16	174	20.88	2	64.17	14.4721	49.6956	0	0	0	0	0	0	2
las_I3	168	20.88	2	35.06	0	14.5704	0	0	0	20.493	0	0	2
szast_I14	168	20.9	1	14.73	0	0	0	14.7282	0	0	0	0	2
szast_I8	207	20.9	2	106.8	0	97.3967	0	0	0	0	9.40355	0	1
las_I4	207	20.92	3	39.96	0	0	0	0	0	2.29599	14.7424	22.9241	1
szast_J11	197	20.93	2	22.5	0	14.8548	0	0	0	7.64037	0	0	2
szast_J14	189	20.95	3	257.37	0	39.5165	0	25.9283	0	162.349	0	0	5
szast_K9	162	20.99	0	0	0	0	0	0	0	0	0	0	1
las_H4	174	21.02	3	155.44	0	130.843	0	5.31969	0	0	0	10.7217	0
szast_H14	181	21.07	3	30.39	0	5.69705	12.6006	0	0	12.0885	0	0	2
szast_J10	162	21.18	0	0	0	0	0	0	0	0	0	0	4
szast_I15	168	21.18	1	9.08	0	0	0	9.08105	0	0	0	0	1
szast_J10	197	21.18	1	31.17	0	31.1748	0	0	0	0	0	0	4
las_G5	197	21.2	1	10.57	0	0	0	0	0	10.569	0	0	1
las_J3	207	21.2	4	197.54	0	35.3154	0	0	0	125.912	19.8263	16.4902	0
szast_I16	174	21.22	1	6.48	0	0	0	6.47992	0	0	0	0	0
las_J3	168	21.23	1	7.51	0	0	0	0	0	0	0	7.50849	0
szast_H7	207	21.27	2	29.34	0	14.3626	0	0	0	0	0	14.9805	0
zreby_F3	207	21.3	1	386.25	0	386.254	0	0	0	0	0	0	0
las_H5	174	21.31	0	0	0	0	0	0	0	0	0	0	0
szast_H15	181	21.32	1	30.94	0	0	0	0	0	30.9429	0	0	1
szast_J13	189	21.33	1	13.56	0	0	0	13.5612	0	0	0	0	2
las_I4	189	21.35	2	332	0	0	0	278.524	0	0	0	53.4706	1
szast_J11	162	21.37	1	10.72	0	0	0	10.7206	0	0	0	0	2
las_I4	168	21.37	4	95.56	0	14.9999	6.94286	64.6118	0	0	0	9.00514	1
szast_H5	207	21.38	4	166.91	0	92.1423	16.5681	14.9074	0	13.3006	0	0	1
szast_I15	174	21.42	2	298.27	0	251.445	0	46.8222	0	0	0	0	1
las_H3	181	21.42	0	0	0	0	0	0	0	0	0	0	0
szast_J12	189	21.43	2	56.61	0	13.0708	0	28.5431	0	0	0	0	1
szast_I16	168	21.47	0	0	0	0	0	0	0	0	0	0	0
szast_K9	197	21.5	2	34.45	0	0	0	21.3848	0	13.0604	0	0	1
zreby_G2	207	21.52	0	0	0	0	0	0	0	0	0	0	0
zreby_H1	197	21.53	1	47.64	0	47.6377	0	0	0	0	0	0	2
szast_H16	181	21.53	3	49.9	0	5.34513	0	14.8478	0	29.7056	0	0	2
las_H4	189	21.53	0	0	0	0	0	0	0	0	0	0	0
las_F5	197	21.53	1	11.38	0	0	0	0	0	0	11.3776	0	0
las_G5	174	21.61	0	0	0	0	0	0	0	0	0	0	1
las_H4	168	21.62	2	162.75	0	148.254	0	0	0	0	0	7.70209	0
szast_I6	207	21.63	1	1.4	0	1.4047	0	0	0	0	0	0	3
las_E5	197	21.63	1	10.99	0	0	0	0	0	0	4.24822	0	0
szast_J11	189	21.67	3	117.96	0	52.947	0	61.3009	0	3.71003	0	0	2
las_C1	162	21.67	1	14.92	0	0	0	0	0	14.918	0	0	0
zreby_B3	189	21.68	1	8.67	0	8.66601	0	0	0	0	0	0	1
las_I3	181	21.7	1	14.1	0	0	0	0	0	0	0	14.1033	2
las_H5	189	21.72	0	0	0	0	0	0	0	0	0	0	0
zreby_G2	197	21.73	2	27.54	0	19.3491	8.19118	0	0	0	0	0	0
zreby_H1	207	21.73	2	212.76	0	178.8	0	0	0	12.2776	0	0	2
las_D1	162	21.73	4	334.78	0	13.5214	16.773	0	0	258.491	0	45.9903	0
szast_H16	168	21.75	1	10.72	0	0	0	10.7182	0	0	0	0	2
las_I3	207	21.75	4	68.77	0	6.39906	7.15107	0	0	0	10.5157	44.7051	2
szast_I9	197	21.77	1	7.18	0	0	0	4.3467	0	0	0	0	1
zreby_C5	174	21.8	2	49.14	0	27.0348	0	0	0	22.1018	0	0	1
zreby_B4	189	21.8	2	117.57	0	91.9654	0	0	0	11.5478	0	0	0
szast_J12	162	21.8	1	41.25	0	0	0	41.2485	0	0	0	0	1
las_J3	181	21.8	3	48.85	0	0	14.1554	14.8266	0	0	13.4105	0	0
las_D5	197	21.82	5	171.53	0	67.5846	10.2061	0	0	65.4188	12.8435	15.4767	0
zreby_F3	197	21.85	1	175.79	0	144.881	0	0	0	0	0	0	0
szast_I14	174	21.85	3	59.07	0	14.3579	0	36.4487	0	8.26625	0	0	2
zreby_H2	207	21.88	3	315.07	0	252.492	6.30763	0	0	42.4755	0	0	0
las_F5	174	21.9	1	22.1	0	0	7.67323	0	0	0	0	0	0
las_G5	189	21.9	1	26.15	0	0	26.1495	0	0	0	0	0	1
zreby_G2	168	21.92	3	27.93	0	13.0941	0	14.0048	0	0	0.833921	0	0
szast_I16	181	21.92	0	2.52	0	0	0	0	0	0	0	0	0
szast_J10	189	21.92	2	201.55	0	33.1062	0	155.564	0	0	0	0	4
las_H5	168	21.92	2	17.87	0	14.9996	2.87124	0	0	0	0	0	0
las_E1	162	21.95	3	114.2	0	35.7986	0	0	0	31.309	0	47.0967	1
zreby_H3	162	21.97	1	21.72	0	0	0	0	0	21.7245	0	0	0
szast_H9	207	21.97	4	298.42	0	141.156	0	33.0694	0	30.1479	23.521	0	0
zreby_D5	174	21.98	2	10.86	0	6.81696	0	0	0	4.0452	0	0	0
zreby_B5	189	22	2	43.68	0	23.8482	0	14.074	0	0	0	0	1
las_H3	207	22	2	4.86	0	2.99154	0	0	0	0	0	1.86897	0
szast_H15	168	22.01	0	0	0	0	0	0	0	0	0	0	1
szast_I8	197	22.01	0	0	0	0	0	0	0	0	0	0	1
zreby_E3	197	22.03	3	81.33	4.20829	69.9302	7.18957	0	0	0	0	0	0
zreby_F3	181	22.06	0	0	0	0	0	0	0	0	0	0	0
szast_I15	181	22.07	3	53.04	0	6.95267	0	31.1116	0	14.978	0	0	1
szast_J13	162	22.08	0	0	0	0	0	0	0	0	0	0	2
szast_J14	174	22.08	2	27.78	0	14.9952	12.7802	0	0	0	0	0	5
zreby_F3	168	22.1	2	62.2	0	58.7083	0	0	0	3.49239	0	0	0
las_C5	197	22.13	4	139.88	0	42.571	0	0	0	41.1868	12.1556	28.9711	0
szast_K9	189	22.15	2	162.13	0	0	0	153.116	0	9.01084	0	0	1
las_F5	189	22.15	0	0	0	0	0	0	0	0	0	0	0
las_G5	168	22.16	0	0	0	0	0	0	0	0	0	0	1
las_I4	181	22.17	3	149.61	0	0	16.9372	0	0	18.9949	0	113.677	1
zreby_H2	162	22.18	3	72.67	0	0	18.8981	23.5366	0	30.2383	0	0	0
zreby_H3	207	22.18	3	94.97	0	23.6433	0	64.6563	0	6.66987	0	0	0
las_E5	174	22.18	1	4.59	0	0	0	0	0	4.59022	0	0	0
zreby_E5	174	22.2	4	64.28	0	6.24292	22.3687	18.6782	0	3.90817	0	0	1
las_F1	162	22.2	3	61.49	0	0	0	17.2152	0	41.1592	3.11742	0	0
zreby_B6	189	22.23	1	108.44	0	108.441	0	0	0	0	0	0	1
szast_H7	197	22.26	0	0	0	0	0	0	0	0	0	0	0
zreby_E3	181	22.27	3	139.68	0	106.223	27.5169	0	0	5.94283	0	0	0
szast_H14	168	22.27	0	0	0	0	0	0	0	0	0	0	2
szast_H10	207	22.27	2	14.6	0	0	2.46564	12.1343	0	0	0	0	0
las_D5	174	22.27	2	31.75	0	0	26.5075	0	5.24064	0	0	0	0
las_G3	207	22.27	2	29.21	0	25.7032	0	0	0	0	0	3.50233	2
zreby_E2	197	22.28	2	21.15	0	14.9138	0	6.23264	0	0	0	0	0
zreby_E3	168	22.33	2	20.5	0	11.3747	9.12775	0	0	0	0	0	0
szast_I14	181	22.33	3	26.17	11.383	9.05696	3.51411	0	0	0	0	0	2
szast_J13	174	22.35	3	55.31	0	36.8416	0	10.2497	0	8.22062	0	0	2
zreby_G4	207	22.37	2	23.23	0	14.1124	0	9.11637	0	0	0	0	0
szast_J14	162	22.37	2	50.95	0	0	0	15.2243	0	35.7287	0	0	5
zreby_F5	174	22.4	1	29.3	0	0	25.9591	0	0	0	0	0	2
las_G1	162	22.4	3	40.63	0	0	13.8088	0	0	18.7798	0	8.04634	2
las_H4	181	22.4	5	31.84	0	0	2.47843	0.89599	0	7.60256	10.9029	9.96379	0
las_E5	189	22.4	3	102.1	0	0	9.80738	0	0	10.6657	0	81.6274	0
las_F5	168	22.41	0	0	0	0	0	0	0	0	0	0	0
las_D4	197	22.42	2	67.21	0	0	0	44.6615	0	0	0	7.62234	3
zreby_H1	162	22.43	1	7.17	0	0	0	0	0	7.17494	0	0	2
szast_I9	189	22.43	2	88.32	0	0	0	39.6407	0	41.2269	0	0	1
szast_H11	207	22.43	2	21.84	0	0	0	0	0	9.18915	0	12.6508	0
zreby_E2	181	22.47	0	2.78	0	0	0	0	0	0	0	0	0
zreby_C5	189	22.48	2	29.44	0	22.2169	5.80544	0	0	0	0	0	1
szast_J14	181	22.5	3	542.15	0	14.0635	0	21.1959	0	506.893	0	0	5
szast_I6	197	22.5	0	0	0	0	0	0	0	0	0	0	3
zreby_E1	197	22.53	1	7.94	0	0	0	7.94121	0	0	0	0	0
szast_H12	168	22.53	0	0	0	0	0	0	0	0	0	0	1
szast_J12	174	22.57	2	112.78	0	65.6956	0	47.0821	0	0	0	0	1
las_C5	174	22.57	1	9.74	0	9.74003	0	0	0	0	0	0	0
zreby_E2	168	22.6	2	22	0	0	6.73613	15.2648	0	0	0	0	0
las_H1	162	22.6	1	1.78	0	0	0	0	0	1.77599	0	0	0
las_D2	197	22.6	0	0	0	0	0	0	0	0	0	0	1
zreby_G4	174	22.62	1	26.34	0	0	0	26.3393	0	0	0	0	0
zreby_F5	207	22.62	3	105.35	0	59.3321	14.9555	0	0	14.9986	0	0	2
szast_I14	162	22.62	0	2.64	0	0	0	0	0	0	0	0	2
las_H2	207	22.63	1	1.47	1.46754	0	0	0	0	0	0	0	0
las_E5	168	22.65	1	3.02	0	0	3.01905	0	0	0	0	0	0
szast_H12	207	22.67	1	20.3	0	20.3039	0	0	0	0	0	0	1
zreby_G2	162	22.68	1	7.01	0	0	0	7.01155	0	0	0	0	0
zreby_E1	181	22.68	3	32.18	0	0	6.94979	16.9245	0	8.30537	0	0	0
zreby_C1	197	22.68	2	24.87	0	19.0567	0	0	0	5.81191	0	0	0
szast_I8	189	22.68	1	20.35	0	0	0	20.3501	0	0	0	0	1
las_D5	189	22.68	4	58.77	5.9828	0	12.1551	0	0	22.0309	0	18.5993	0
szast_J13	181	22.72	3	60.59	0	0	6.91557	52.5088	0	1.16556	0	0	2
zreby_E1	168	22.75	2	24.95	0	0	0	21.9979	0	2.95577	0	0	0
szast_H5	197	22.75	1	16.23	0	0	0	0	0	16.2329	0	0	1
las_H5	181	22.75	0	0	0	0	0	0	0	0	0	0	0
zreby_D5	189	22.77	1	8.88	0	8.87516	0	0	0	0	0	0	0
szast_J11	174	22.78	3	85.82	0	0	0	60.0346	0	15	10.7892	0	2
las_C1	197	22.78	2	31.33	0	9.69179	0	21.6363	0	0	0	0	0
las_I1	207	22.78	3	64.5	0	11.7791	0	0	0	9.32516	0	43.4006	0
szast_H11	168	22.79	0	0	0	0	0	0	0	0	0	0	0
zreby_E5	207	22.83	3	160.25	0	65.655	0	51.0087	0	43.5901	0	0	1
zreby_E5	189	22.85	2	34.95	0	28.0583	0	0	0	6.89148	0	0	1
zreby_C2	197	22.85	2	23.62	0	20.9262	2.69368	0	0	0	0	0	1
zreby_H3	174	22.87	1	16.06	0	0	0	0	0	16.064	0	0	0
las_D5	168	22.87	2	14.65	0	0	12.4662	0	0	0	0	2.18713	0
zreby_C1	181	22.88	4	88.4	0	48.229	2.31409	16.748	0	21.11	0	0	0
las_I1	162	22.91	0	0	0	0	0	0	0	0	0	0	0
las_C5	189	22.93	1	9.3	0	0	0	0	0	9.30189	0	0	0
zreby_F3	162	22.95	1	13.55	0	0	13.5519	0	0	0	0	0	0
szast_J12	181	22.96	0	0	0	0	0	0	0	0	0	0	1
las_D4	174	22.97	2	10.24	0	0	0	6.06167	0	0	4.17521	0	3
szast_I15	162	22.98	2	14.76	0	0	0	9.62475	0	5.13093	0	0	1
las_D1	197	23.03	3	92.35	0	43.4875	8.17635	0	0	0	0	40.6825	0
szast_H7	189	23.05	0	5.04	0	0	0	0	0	0	0	0	0
szast_H10	168	23.06	0	0	0	0	0	0	0	0	0	0	0
zreby_H2	174	23.08	2	38.9	0	0	0	28.6396	0	9.00319	0	0	0
zreby_C2	181	23.08	1	41.28	0	41.2825	0	0	0	0	0	0	1
zreby_C3	197	23.08	0	0	0	0	0	0	0	0	0	0	1
szast_J10	174	23.08	1	11.12	0	0	0	0	0	11.1163	0	0	4
szast_H9	197	23.08	0	0	0	0	0	0	0	0	0	0	0
zreby_C1	168	23.1	0	1.41	0	0	0	0	0	0	0	0	0
zreby_F5	189	23.1	2	74.58	0	56.712	6.18596	0	0	0	0	0	2
zreby_D5	207	23.1	1	14.98	0	0	0	0	0	14.9773	0	0	0
las_G5	181	23.1	1	12.6	0	0	0	12.602	0	0	0	0	1
las_H1	207	23.12	2	10.69	0	0	0	2.81295	0	0	0	7.87698	0
zreby_E3	162	23.13	0	0	0	0	0	0	0	0	0	0	0
las_D2	174	23.17	0	0	0	0	0	0	0	0	0	0	1
szast_J11	181	23.2	1	167.26	0	0	0	167.265	0	0	0	0	2
las_C5	168	23.2	0	0	0	0	0	0	0	0	0	0	0
las_H2	162	23.21	0	0	0	0	0	0	0	0	0	0	0
las_E1	197	23.22	2	23.66	0	4.34805	0	0	0	0	0	7.51381	1
zreby_H1	174	23.27	3	32.12	0	0	14.0622	0	0	5.52148	12.5373	0	2
zreby_C5	207	23.27	3	130.73	0	74.7106	14.8929	0	0	26.1269	0	0	1
las_D4	189	23.27	0	0	0	0	0	0	0	0	0	0	3
las_G1	207	23.27	3	55.27	0	0	14.1959	0	0	29.1294	0	11.941	2
zreby_C2	168	23.28	0	0	0	0	0	0	0	0	0	0	1
szast_I6	189	23.28	1	11.98	0	11.9828	0	0	0	0	0	0	3
zreby_E2	162	23.3	1	7.03	0	0	0	0	0	7.03375	0	0	0
zreby_C3	181	23.3	3	35.79	0	15.9112	0	7.48696	0	12.3877	0	0	1
zreby_B3	197	23.3	1	5.65	0	0	0	0	0	0	0	5.6479	1
szast_I16	162	23.3	0	0	0	0	0	0	0	0	0	0	0
szast_H9	168	23.32	0	0	0	0	0	0	0	0	0	0	0
las_F5	181	23.35	1	11.14	0	0	0	11.1352	0	0	0	0	0
szast_K9	174	23.37	2	35.92	0	0	0	10.463	0	17.0462	0	0	1
szast_I16	207	23.37	1	24.63	0	12.5887	0	0	0	0	0	0	0
las_C1	174	23.38	0	0	0	0	0	0	0	0	0	0	0
szast_H10	197	23.4	0	14.79	0	0	0	0	0	0	0	0	0
zreby_G4	189	23.43	0	0	0	0	0	0	0	0	0	0	0
szast_J10	181	23.43	3	386.6	0	14.9964	0	367.48	0	4.12504	0	0	4
zreby_C3	168	23.45	1	14.45	0	0	0	14.4514	0	0	0	0	1
zreby_B6	207	23.45	1	56.45	0	48.8845	0	0	0	0	0	0	1
las_F1	197	23.45	0	0	0	0	0	0	0	0	0	0	0
las_E5	181	23.48	1	43.02	0	0	0	0	0	35.7382	0	0	0
las_F1	207	23.5	2	32.14	0	0	0	0	0	14.2436	0	17.8937	0
zreby_B3	181	23.52	2	22.18	0	0	0	10.7846	0	0	11.3923	0	1
las_G3	162	23.52	2	9.18	0	6.16483	3.01809	0	0	0	0	0	2
zreby_G2	174	23.53	2	25.77	0	19.0377	0	0	0	6.73515	0	0	0
zreby_B4	197	23.53	0	0	0	0	0	0	0	0	0	0	0
szast_H16	207	23.53	4	353.18	0	46.5517	10.2492	40.3121	0	239.638	0	0	2
las_D4	168	23.53	2	6.87	0	0	0	2.68497	0	0	0	4.18831	3
zreby_E1	162	23.55	0	0	0	0	0	0	0	0	0	0	0
szast_H5	189	23.55	3	20.55	0	0	4.91691	6.21259	0	9.42227	0	0	1
szast_H5	168	23.58	0	0	0	0	0	0	0	0	0	0	1
szast_I9	174	23.58	0	0	0	0	0	0	0	0	0	0	1
las_D1	174	23.59	0	0	0	0	0	0	0	0	0	0	0
las_D2	189	23.6	0	0	0	0	0	0	0	0	0	0	1
szast_H16	162	23.62	1	22.18	0	0	0	0	0	22.177	0	0	2
szast_H11	197	23.67	0	0	0	0	0	0	0	0	0	0	0
las_G1	197	23.68	0	0	0	0	0	0	0	0	0	0	2
zreby_B3	168	23.7	1	7.81	0	0	7.81363	0	0	0	0	0	1
zreby_B4	181	23.72	2	10.07	0	0	0	6.3491	0	3.72532	0	0	0
zreby_B5	207	23.73	1	40.92	0	40.9216	0	0	0	0	0	0	1
las_E1	207	23.73	3	14.77	0	1.17299	0	0	0	4.67995	0	8.92148	1
las_H3	162	23.74	0	0	0	0	0	0	0	0	0	0	0
szast_K9	181	23.75	3	42.93	0	14.0725	0	5.9276	0	22.9334	0	0	1
zreby_H3	189	23.77	1	13.51	0	0	0	12.3313	0	0	0	0	0
zreby_B5	197	23.77	1	10.97	0	10.9674	0	0	0	0	0	0	1
las_D5	181	23.77	2	25.19	0	0	12.3645	0	0	0	12.8266	0	0
szast_H7	174	23.78	1	11.28	0	0	0	0	0	11.2829	0	0	0
szast_H15	207	23.78	0	0	0	0	0	0	0	0	0	0	1
zreby_C1	162	23.8	1	1.61	1.6094	0	0	0	0	0	0	0	0
las_E1	174	23.8	0	0	0	0	0	0	0	0	0	0	1
zreby_F3	174	23.82	1	5.04	0	0	5.03545	0	0	0	0	0	0
las_D1	189	23.83	2	32.83	0	8.56583	24.2665	0	0	0	0	0	0
szast_I6	168	23.84	0	0	0	0	0	0	0	0	0	0	3
zreby_B4	207	23.85	1	25.18	0	0	0	0	0	25.1843	0	0	0
szast_H15	162	23.9	1	1.38	0	0	0	1.38327	0	0	0	0	1
las_H1	197	23.91	0	0	0	0	0	0	0	0	0	0	0
zreby_B4	168	23.92	0	0	0	0	0	0	0	0	0	0	0
szast_I8	174	23.92	1	8.71	0	8.71293	0	0	0	0	0	0	1
szast_H9	189	23.92	0	0	0	0	0	0	0	0	0	0	0
szast_H12	197	23.93	1	41.74	0	0	0	0	0	36.0361	0	0	1
las_D2	168	23.93	0	0	0	0	0	0	0	0	0	0	1
las_C1	189	23.93	3	61.08	0	37.8481	0	8.23021	0	0	0	14.9998	0
zreby_H2	189	23.97	2	20.3	0	17.2055	0	0	0	3.09116	0	0	0
zreby_B6	197	23.97	0	0	0	0	0	0	0	0	0	0	1
las_I3	162	23.97	2	5.41	0	0	2.06273	0	0	0	0	3.35059	2
zreby_E3	174	23.99	0	0	0	0	0	0	0	0	0	0	0
zreby_B5	181	24	1	3.61	0	0	0	0	0	3.61451	0	0	1
las_F1	174	24	0	0	0	0	0	0	0	0	0	0	0
las_D1	207	24	2	7.48	0	5.37334	0	0	0	0	0	2.11041	0
zreby_C2	162	24.01	0	0	0	0	0	0	0	0	0	0	1
zreby_B3	207	24.02	1	14.06	0	0	0	8.01273	0	0	0	0	1
szast_H14	207	24.03	2	146.91	0	0	12.7993	33.4616	0	0	0	0	2
las_C5	181	24.05	2	208.76	0	198.275	10.4823	0	0	0	0	0	0
szast_H7	168	24.1	0	0	0	0	0	0	0	0	0	0	0
zreby_H1	189	24.13	1	14.01	0	0	0	0	0	0	14.0067	0	2
szast_I9	181	24.13	1	5.98	0	0	0	0	0	5.9793	0	0	1
zreby_B5	168	24.14	0	0	0	0	0	0	0	0	0	0	1
las_I1	197	24.14	0	0	0	0	0	0	0	0	0	0	0
zreby_E2	174	24.17	0	0	0	0	0	0	0	0	0	0	0
zreby_C5	197	24.17	0	0	0	0	0	0	0	0	0	0	1
szast_H14	197	24.19	0	0	0	0	0	0	0	0	0	0	2
zreby_B6	181	24.21	0	0	0	0	0	0	0	0	0	0	1
las_G1	174	24.21	0	0	0	0	0	0	0	0	0	0	2
zreby_C3	162	24.22	1	7.29	0	0	0	0	0	7.29016	0	0	1
las_D2	207	24.22	1	17.35	0	0	0	0	0	0	0	17.3467	1
szast_H14	162	24.23	0	0	0	0	0	0	0	0	0	0	2
las_J3	162	24.23	0	0	0	0	0	0	0	0	0	0	0
zreby_C3	207	24.27	2	40.58	0	26.0168	0	10.3781	0	0	0	0	1
szast_H10	189	24.28	1	10.18	0	10.1837	0	0	0	0	0	0	0
las_E1	189	24.28	1	5.04	0	5.04072	0	0	0	0	0	0	1
las_D4	207	24.32	3	40.19	0	0	8.53543	0	0	0	14.1429	17.5126	3
las_C1	168	24.33	1	9.55	0	0	9.55427	0	0	0	0	0	0
zreby_E1	174	24.34	0	0	0	0	0	0	0	0	0	0	0
zreby_B3	162	24.35	1	14.21	0	0	14.2076	0	0	0	0	0	1
zreby_B6	168	24.36	0	0	0	0	0	0	0	0	0	0	1
szast_I8	181	24.37	0	0	0	0	0	0	0	0	0	0	1
las_H2	197	24.37	1	11.11	0	0	0	0	0	0	11.1141	0	0
zreby_D5	197	24.38	0	0	0	0	0	0	0	0	0	0	0
zreby_C5	181	24.42	2	24.53	0	17.4253	0	7.10371	0	0	0	0	1
las_H1	174	24.42	3	23.52	9.3741	0	4.17007	9.97407	0	0	0	0	0
las_D4	181	24.43	2	58.56	0	0	0	0	0	49.351	9.21215	0	3
szast_H15	197	24.45	0	0	0	0	0	0	0	0	0	0	1
las_F1	189	24.45	0	1.27	0	0	0	0	0	0	0	0	0
zreby_G2	189	24.48	1	8.79	0	8.79052	0	0	0	0	0	0	0
las_I4	162	24.5	1	14.92	0	14.9185	0	0	0	0	0	0	1
zreby_C1	174	24.52	2	4.3	0	0	0	1.66649	0	2.63202	0	0	0
zreby_D5	181	24.53	1	14.24	0	0	0	0	0	14.2356	0	0	0
zreby_C2	207	24.53	2	8.1	0	4.56586	0	0	0	0	0	3.53533	1
szast_H12	162	24.57	1	3.94	0	0	0	0	0	3.93626	0	0	1
zreby_C5	168	24.58	1	10.52	0	0	0	10.5207	0	0	0	0	1
zreby_E5	197	24.58	0	0	0	0	0	0	0	0	0	0	1
las_G3	197	24.58	1	6.47	0	6.47204	0	0	0	0	0	0	2
zreby_B4	162	24.6	0	0	0	0	0	0	0	0	0	0	0
las_C1	207	24.6	2	27.2	0	12.2202	0	0	0	0	0	14.9787	0
szast_H7	181	24.61	0	0	0	0	0	0	0	0	0	0	0
zreby_F3	189	24.62	0	0	0	0	0	0	0	0	0	0	0
las_G1	189	24.69	0	0	0	0	0	0	0	0	0	0	2
zreby_C1	207	24.7	3	35.95	0	0	10.6981	20.3225	0	4.93291	0	0	0
zreby_D5	168	24.73	1	7.72	0	0	0	7.72036	0	0	0	0	0
zreby_C2	174	24.74	0	0	0	0	0	0	0	0	0	0	1
zreby_E3	189	24.75	2	26.14	0	7.00044	0	19.1435	0	0	0	0	0
zreby_F5	197	24.78	0	0	0	0	0	0	0	0	0	0	2
las_H4	162	24.79	0	0	0	0	0	0	0	0	0	0	0
las_D2	181	24.82	3	33.25	0	0	12.5165	0	0	14.4016	0	6.33623	1
zreby_B5	162	24.84	0	0	0	0	0	0	0	0	0	0	1
szast_H11	162	24.84	0	0	0	0	0	0	0	0	0	0	0
szast_I6	181	24.85	3	191.97	0	28.5547	0	0	0	144.383	19.0332	0	3
zreby_E5	181	24.87	2	17.95	0	0	0	12.5811	0	5.37103	0	0	1
las_H3	197	24.88	2	20.93	0	0	12.9739	0	0	0	0	7.95446	0
las_H1	189	24.93	0	0	0	0	0	0	0	0	0	0	0
zreby_E5	168	24.95	0	0	0	0	0	0	0	0	0	0	1
zreby_C3	174	24.97	0	0	0	0	0	0	0	0	0	0	1
zreby_G4	197	24.98	0	0	0	0	0	0	0	0	0	0	0
las_I3	197	24.98	2	92.26	0	0	0	30.1183	0	40.0291	0	0	2
zreby_E1	207	25	0	0	0	0	0	0	0	0	0	0	0
zreby_F5	181	25.02	1	21.05	0	0	21.0532	0	0	0	0	0	2
zreby_E2	189	25.03	1	2.74	2.74022	0	0	0	0	0	0	0	0
zreby_B6	162	25.09	0	0	0	0	0	0	0	0	0	0	1
las_H5	162	25.09	0	0	0	0	0	0	0	0	0	0	0
szast_H10	162	25.11	0	0	0	0	0	0	0	0	0	0	0
zreby_G4	181	25.12	0	0	0	0	0	0	0	0	0	0	0
zreby_E1	189	25.15	1	16.33	0	0	0	0	0	16.3297	0	0	0
zreby_F5	168	25.17	1	6.68	0	0	6.67823	0	0	0	0	0	2
las_I1	189	25.17	0	0	0	0	0	0	0	0	0	0	0
zreby_B3	174	25.2	3	22.88	0	7.25007	11.4149	4.21938	0	0	0	0	1
zreby_H3	181	25.22	3	56.98	0	41.1132	8.52221	0	0	7.34091	0	0	0
las_C1	181	25.23	4	38.87	0	8.83339	0	14.9683	0	14.035	1.03373	0	0
zreby_E2	207	25.3	1	2.52	0	0	0	0	0	2.51658	0	0	0
zreby_C5	162	25.33	1	9.62	0	0	9.61503	0	0	0	0	0	1
las_J3	197	25.35	1	10.2	0	0	10.1977	0	0	0	0	0	0
zreby_C1	189	25.38	0	0	0	0	0	0	0	0	0	0	0
szast_H9	162	25.38	0	0	0	0	0	0	0	0	0	0	0
las_G5	162	25.38	0	0	0	0	0	0	0	0	0	0	1
las_H2	189	25.4	0	0	0	0	0	0	0	0	0	0	0
zreby_G4	168	25.41	0	0	0	0	0	0	0	0	0	0	0
zreby_H2	181	25.42	0	0	0	0	0	0	0	0	0	0	0
zreby_E3	207	25.45	1	14.67	0	0	0	14.6709	0	0	0	0	0
zreby_B4	174	25.47	2	10.91	0	0	0	0	0	7.91285	0	3.00108	0
las_I4	197	25.48	1	47.81	0	0	0	47.8066	0	0	0	0	1
las_D1	181	25.55	2	12	0	3.65863	0	0	0	0	0	8.33785	0
zreby_H1	181	25.62	3	26.93	0	8.80574	0	6.26026	0	11.8682	0	0	2
zreby_C2	189	25.62	2	11.19	0	0	9.15856	0	0	2.03146	0	0	1
zreby_D5	162	25.63	1	11.96	0	0	11.9622	0	0	0	0	0	0
zreby_B5	174	25.63	1	6.76	0	6.76419	0	0	0	0	0	0	1
las_G3	189	25.64	0	0	0	0	0	0	0	0	0	0	2
zreby_H3	168	25.65	0	0	0	0	0	0	0	0	0	0	0
las_F5	162	25.67	0	0	0	0	0	0	0	0	0	0	0
zreby_E5	162	25.68	2	20.28	0	0	11.7388	8.53786	0	0	0	0	1
las_H4	197	25.78	0	7.37	0	0	0	0	0	0	0	0	0
zreby_B6	174	25.82	1	4.74	0	0	0	4.73843	0	0	0	0	1
las_E1	181	25.82	2	20.1	0	0	0	0	0	13.2999	6.80482	0	1
las_H3	189	25.88	0	0	0	0	0	0	0	0	0	0	0
zreby_H2	168	25.89	0	0	0	0	0	0	0	0	0	0	0
zreby_F5	162	25.95	1	24.64	0	0	24.6439	0	0	0	0	0	2
las_E5	162	25.97	1	1.6	0	0	1.59862	0	0	0	0	0	0
zreby_G2	181	26.02	2	14.68	0	0	8.36051	0	0	6.31915	0	0	0
las_H5	197	26.03	2	24.27	0	14.8948	0	9.37158	0	0	0	0	0
las_F1	181	26.08	1	7.81	0	0	0	0	0	7.80799	0	0	0
las_I3	189	26.12	0	0	0	0	0	0	0	0	0	0	2
zreby_H1	168	26.13	1	2.41	0	0	0	0	0	2.41187	0	0	2
zreby_G4	162	26.16	0	0	0	0	0	0	0	0	0	0	0
las_D5	162	26.18	1	2.93	0	0	2.93088	0	0	0	0	0	0
las_J3	189	26.36	0	0	0	0	0	0	0	0	0	0	0
las_G1	181	26.4	1	6.47	6.47215	0	0	0	0	0	0	0	2
szast_H11	189	26.43	1	1.22	0	1.21774	0	0	0	0	0	0	0
las_C5	162	26.45	3	30.79	26.1113	0	2.0523	2.62224	0	0	0	0	0
szast_H5	181	26.57	1	1.39	0	0	0	0	0	1.39153	0	0	1
las_H1	181	26.65	2	17.5	0	8.36336	9.14119	0	0	0	0	0	0
las_D4	162	26.7	1	11.55	0	0	11.546	0	0	0	0	0	3
las_I1	181	26.88	0	0	0	0	0	0	0	0	0	0	0
las_D2	162	26.95	0	0	0	0	0	0	0	0	0	0	1
las_H2	181	27.12	1	9.39	0	0	0	9.39283	0	0	0	0	0
las_G3	181	27.25	2	21.76	0	0	0	9.71518	0	12.0432	0	0	2
